# Supplementary material for: Candidate locus analysis of the TERT–CLPTM1L cancer risk region on chromosome 5p15 identifies multiple independent variants associated with endometrial cancer risk
Source: Springer Nature journal article supplement (doi:10.1007/s00439-014-1515-4), 2014-12-08

LONDON  
SCHOOL of  
HYGIENE  
& TROPICAL  
MEDICINE

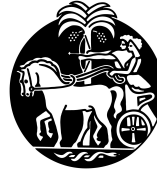

Carvajal-Carmona, LG; O'Mara, TA; Painter, JN; Lose, FA; Dennis, J; Michailidou, K; Tyrer, JP; Ahmed, S; Ferguson, K; Healey, CS; Pooley, K; Beesley, J; Cheng, T; Jones, A; Howarth, K; Martin, L; Gorman, M; Hodgson, S; National Study of Endometrial Cancer Genetics Group (NSEC), ; Australian National Endometrial Cancer Study Group (ANEC), ; Wentzensen, N; Fasching, PA; Hein, A; Beckmann, MW; Renner, SP; Drk, T; Hillemanns, P; Drst, M; Runnebaum, I; Lambrechts, D; Coenegrachts, L; Schrauwen, S; Amant, F; Winterhoff, B; Dowdy, SC; Goode, EL; Teoman, A; Salvesen, HB; Trovik, J; Njolstad, TS; Werner, HM; Scott, RJ; Ashton, K; Proietto, T; Otton, G; Wersll, O; Mints, M; Tham, E; RENDOCAS, ; Hall, P; Czene, K; Liu, J; Li, J; Hopper, JL; Southey, MC; Australian Ovarian Cancer Study (AOCS), ; Ekici, AB; Ruebner, M; Johnson, N; Peto, J; Burwinkel, B; Marme, F; Brenner, H; Dieffenbach, AK; Meindl, A; Brauch, H; GENICA Network, ; Lindblom, A; Depreeuw, J; Moisse, M; Chang-Claude, J; Rudolph, A; Couch, FJ; Olson, JE; Giles, GG; Bruinsma, F; Cunningham, JM; Fridley, BL; Brresen-Dale, AL; Kristensen, VN; Cox, A; Swerdlow, AJ; Orr, N; Bolla, MK; Wang, Q; Weber, RP; Chen, Z; Shah, M; Pharoah, PD; Dunning, AM; Tomlinson, I; Easton, DF; Spurdle, AB; Thompson, DJ (2014) Candidate locus analysis of the TERT-CLPTM1L cancer risk region on chromosome 5p15 identifies multiple independent variants associated with endometrial cancer risk. *Human genetics*, 134 (2). pp. 231-45. ISSN 0340-6717 DOI: <https://doi.org/10.1007/s00439-014-1515-4>

Downloaded from: <http://researchonline.lshtm.ac.uk/2138315/>

DOI: [10.1007/s00439-014-1515-4](https://doi.org/10.1007/s00439-014-1515-4)

#### Usage Guidelines

Please refer to usage guidelines at <http://researchonline.lshtm.ac.uk/policies.html> or alternatively contact [researchonline@lshtm.ac.uk](mailto:researchonline@lshtm.ac.uk).

Available under license: <http://creativecommons.org/licenses/by/2.5/>

**UK GWAS info**

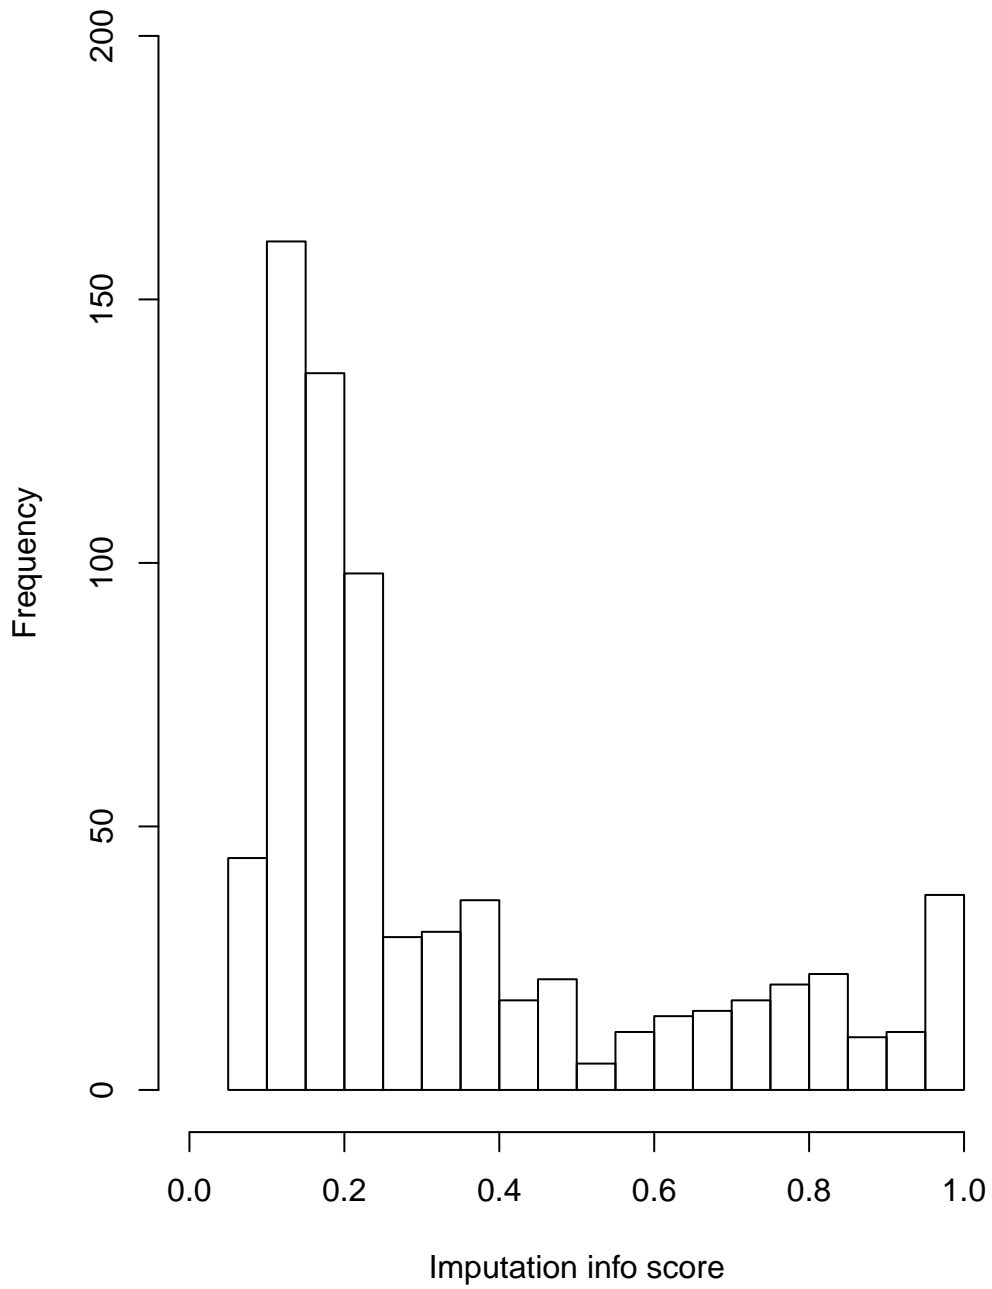

**iCOGS info**

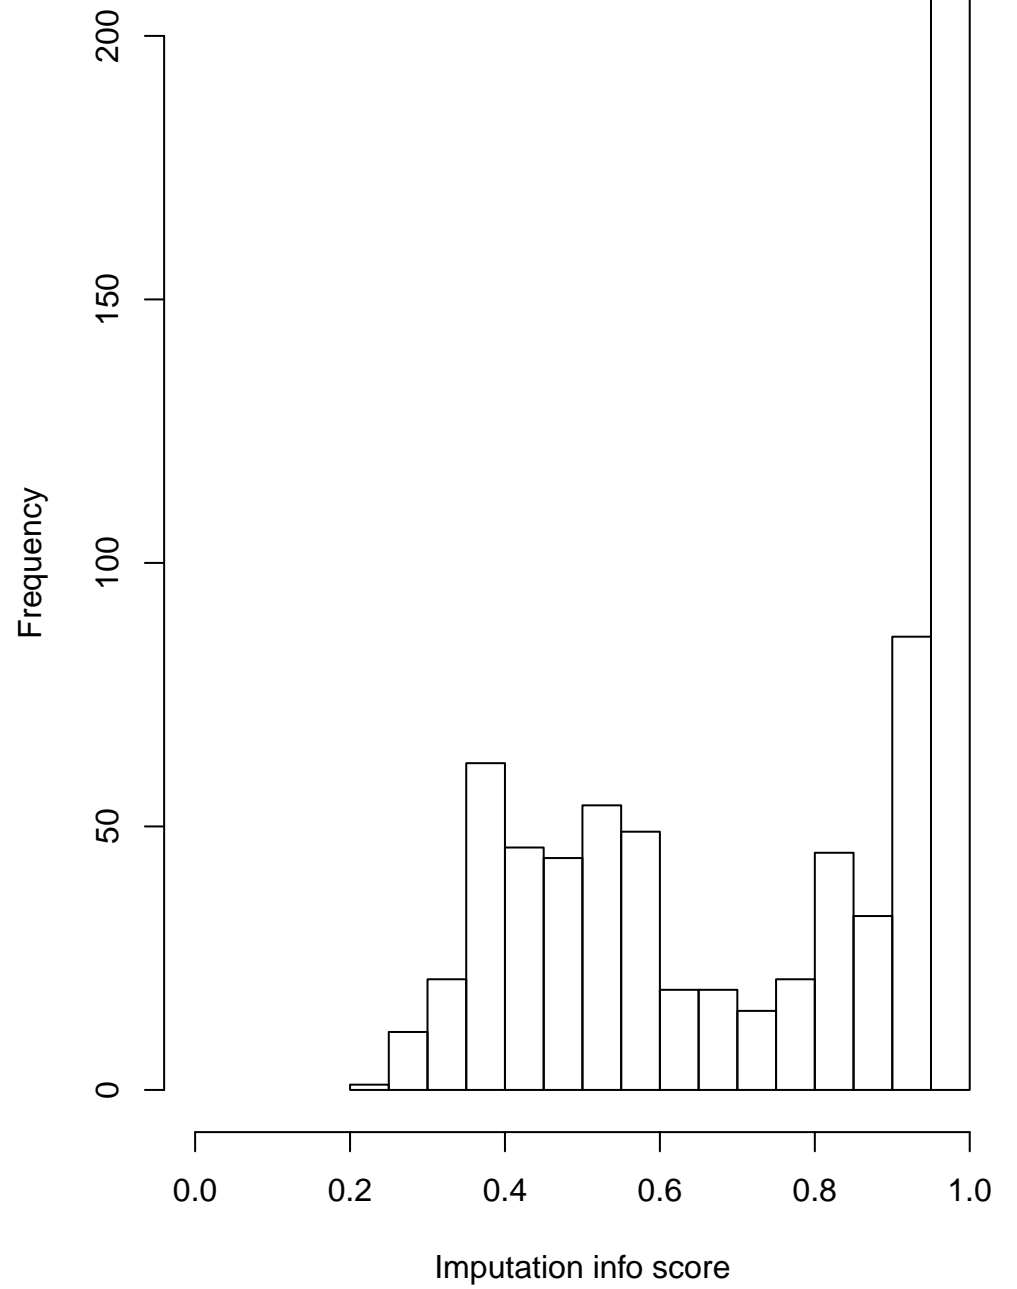

Supplement: MOESM2 [file 439_2014_1515_MOESM2_ESM.pdf]
