# Supplementary material for: Candidate locus analysis of the TERT–CLPTM1L cancer risk region on chromosome 5p15 identifies multiple independent variants associated with endometrial cancer risk
Source: Springer Nature journal article supplement (doi:10.1007/s00439-014-1515-4), 2014-12-08

**UK GWAS info**

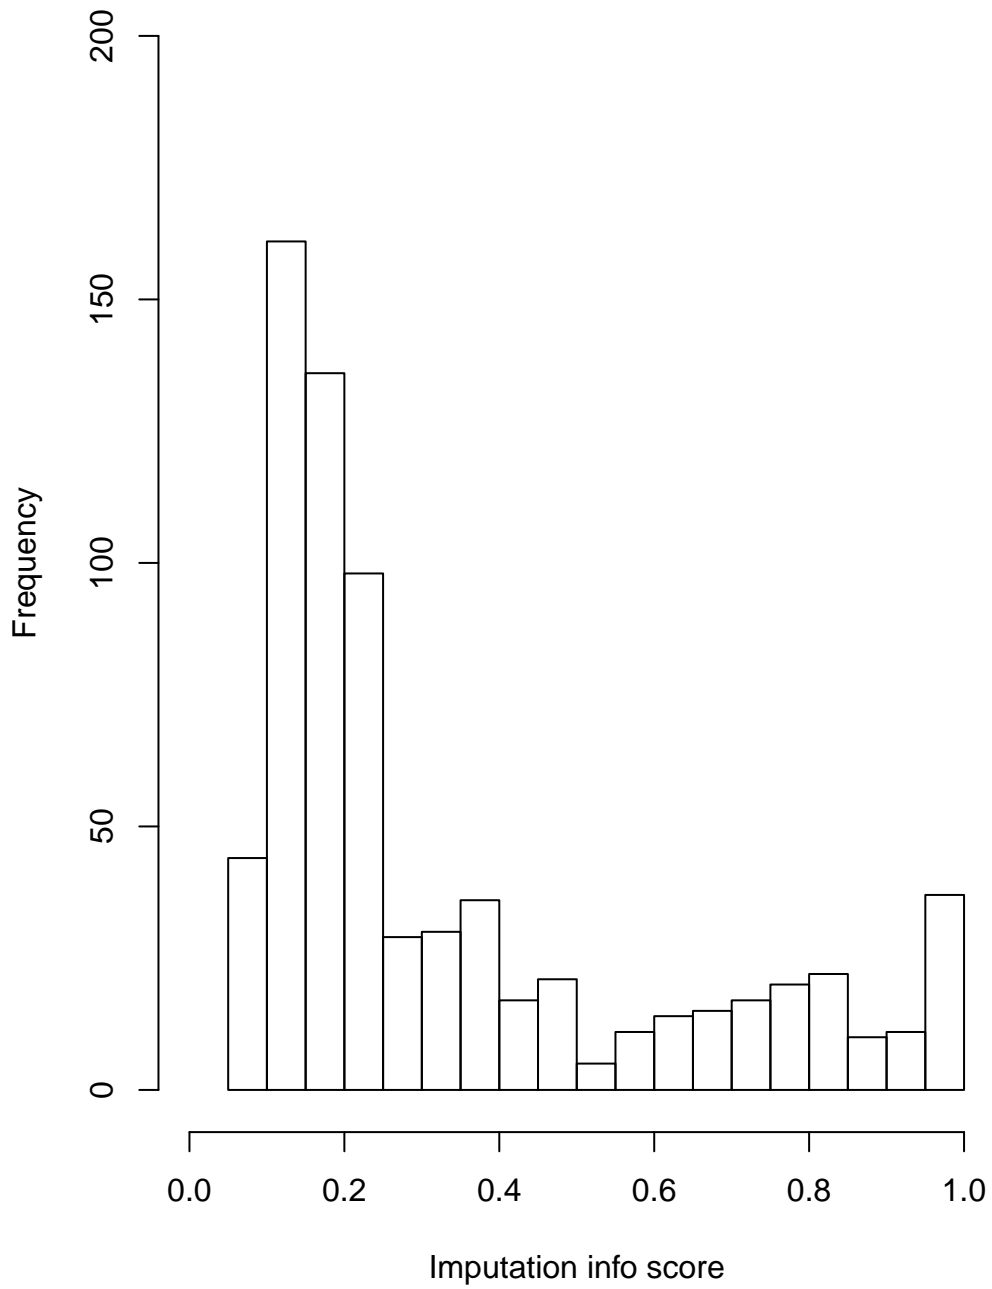

**iCOGS info**

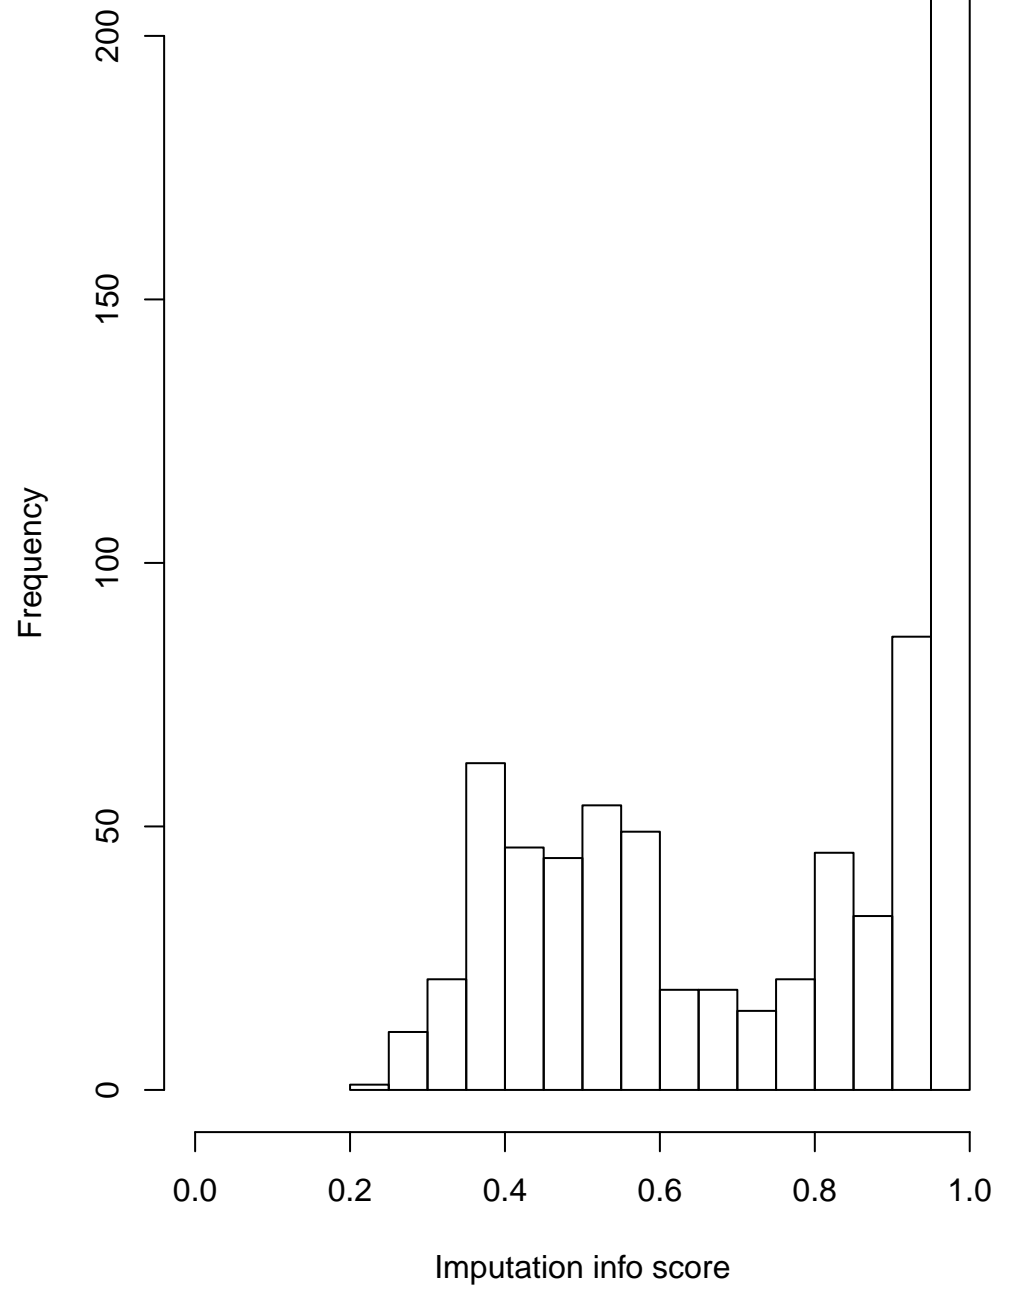

Supplement: MOESM2 [file 439_2014_1515_MOESM2_ESM.pdf]
